# Supplementary material
Source: publisher figshare collection journal article supplement (https://acs.figshare.com/ndownloader/files/24083935)
Supplement: Supplementary file 1 [file 24083935]

# Supporting Information for

## Intramolecular Hydrogen Bonding: A Key Factor Controlling Photosubstitution of Ruthenium Complexes

Masanari Hirahara<sup>\*a</sup>, Hiroyuki Nakano, Kyohei Uchida<sup>a</sup>, Rei Yamamoto<sup>a</sup>, and Yasushi Umemura<sup>a</sup>

Department of Applied Chemistry, School of Applied Science, National Defense Academy of Japan,  
Hashirimizu 1-10-20, Yokosuka, Kanagawa, 239-8686

E-mail: [hirahara@nda.ac.jp](mailto:hirahara@nda.ac.jp)

### Supporting Information

#### Contents

|                                                                                                                                                                 |     |
|-----------------------------------------------------------------------------------------------------------------------------------------------------------------|-----|
| <i>Experimental details for photosubstitution reactions</i>                                                                                                     | S3  |
| Figure S1—Experimental setup for light irradiation with a blue LED lamp                                                                                         | S3  |
| <i>Titration experiments for pK<sub>a</sub> determination</i>                                                                                                   | S4  |
| Figure S2—Absorption spectra of <b>1a</b> during titration with DBU (0-3.0 equivalents)                                                                         | S4  |
| Figure S3— <sup>1</sup> H NMR spectra during titration experiments with lutidine                                                                                | S5  |
| Determination of pK <sub>a</sub> value of <b>1a</b>                                                                                                             | S6  |
| Figure S4—Absorption spectra of <b>1b</b> during titration with TBD (1-40 equivalents)                                                                          | S7  |
| Figure S5—Absorption spectra of <b>1b</b> during titration with DBU (1-50 equivalents)                                                                          | S8  |
| Determination of pK <sub>a</sub> value of <b>1b</b>                                                                                                             | S9  |
| <i>Additional absorption and <sup>1</sup>H NMR spectra</i>                                                                                                      | S10 |
| Figure S6—Absorption spectra of [Ru(bpy) <sub>3</sub> ] <sup>2+</sup> and <i>cis</i> -[Ru(bpy) <sub>2</sub> (py) <sub>2</sub> ] <sup>2+</sup> during photolysis | S10 |
| Figure S7— <sup>1</sup> H NMR spectra of <i>cis</i> -[Ru(bpy) <sub>2</sub> (MeCN) <sub>2</sub> ] <sup>2+</sup> during photolysis                                | S11 |
| Figure S8—Absorption spectra of <b>1c</b> (37 μM) and TBD (16 mM) during photolysis with TEACl                                                                  | S12 |
| Figure S9— <sup>1</sup> H NMR spectra of <b>1b</b> in the absence of TEACl during photolysis                                                                    | S13 |
| Figure S10—Absorption spectra of <b>1b</b> in the absence of TEACl during photolysis                                                                            | S14 |
| Figure S11— <sup>1</sup> H NMR spectra of <b>1c</b> in the absence of TEACl during photolysis                                                                   | S15 |
| Figure S12—Normalized absorption spectra of <b>1b</b> in various solvents                                                                                       | S16 |
| <i>DFT calculation results</i>                                                                                                                                  | S17 |
| Figure S13—Optimized structures of <b>1a</b> , <b>1b</b> , and <b>1c</b> .                                                                                      | S17 |
| Figure S14—Energy level diagram of molecular orbitals of <b>1a</b> , <b>1b</b> , and <b>1c</b> .                                                                | S18 |
| Figure S15—Frontier molecular orbitals of <b>1a</b> , <b>1b</b> , and <b>1c</b> .                                                                               | S19 |
| <i>Tables for X-ray crystallography</i>                                                                                                                         | S20 |
| Table S1—Selected crystallographic parameters                                                                                                                   | S20 |
| Table S2—Selected bond distances (Å) and angles (°)                                                                                                             | S21 |



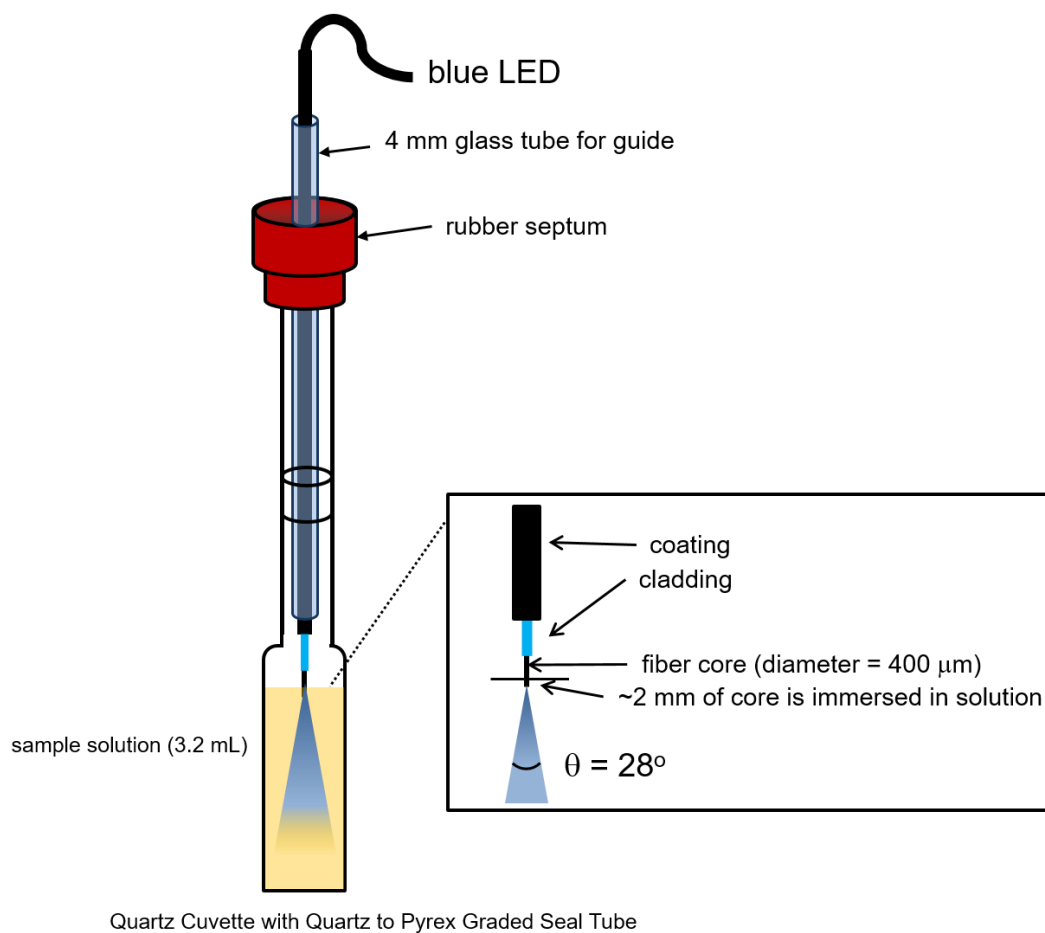

**Figure S1.** Experimental setup for the photosubstitution experiments with blue LED.

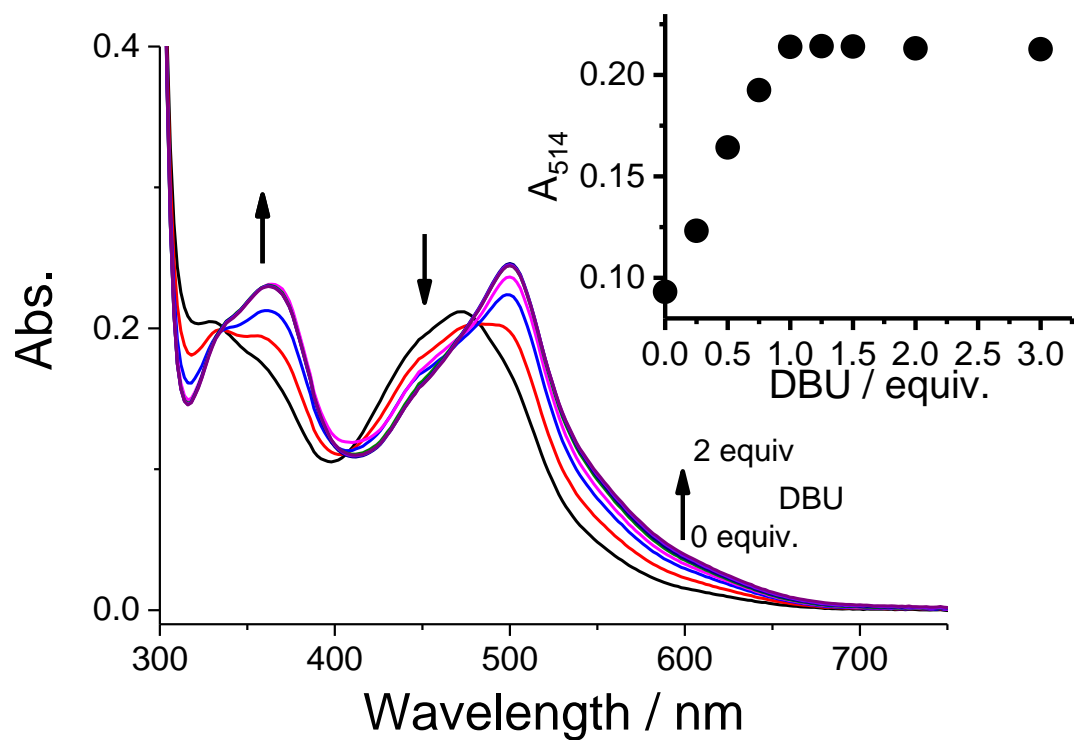

**Figure S2.** Absorption spectral changes of **1a** during the titration experiments with DBU as a base. Inset shows the changes of absorption at 514 nm upon the addition of DBU. The absorption maxima (500 nm) of mono-deprotonated complex **1b** coincides with the reported value.<sup>1</sup> Absorption spectra upon addition of excess amount of DBU are shown in Figure S5.

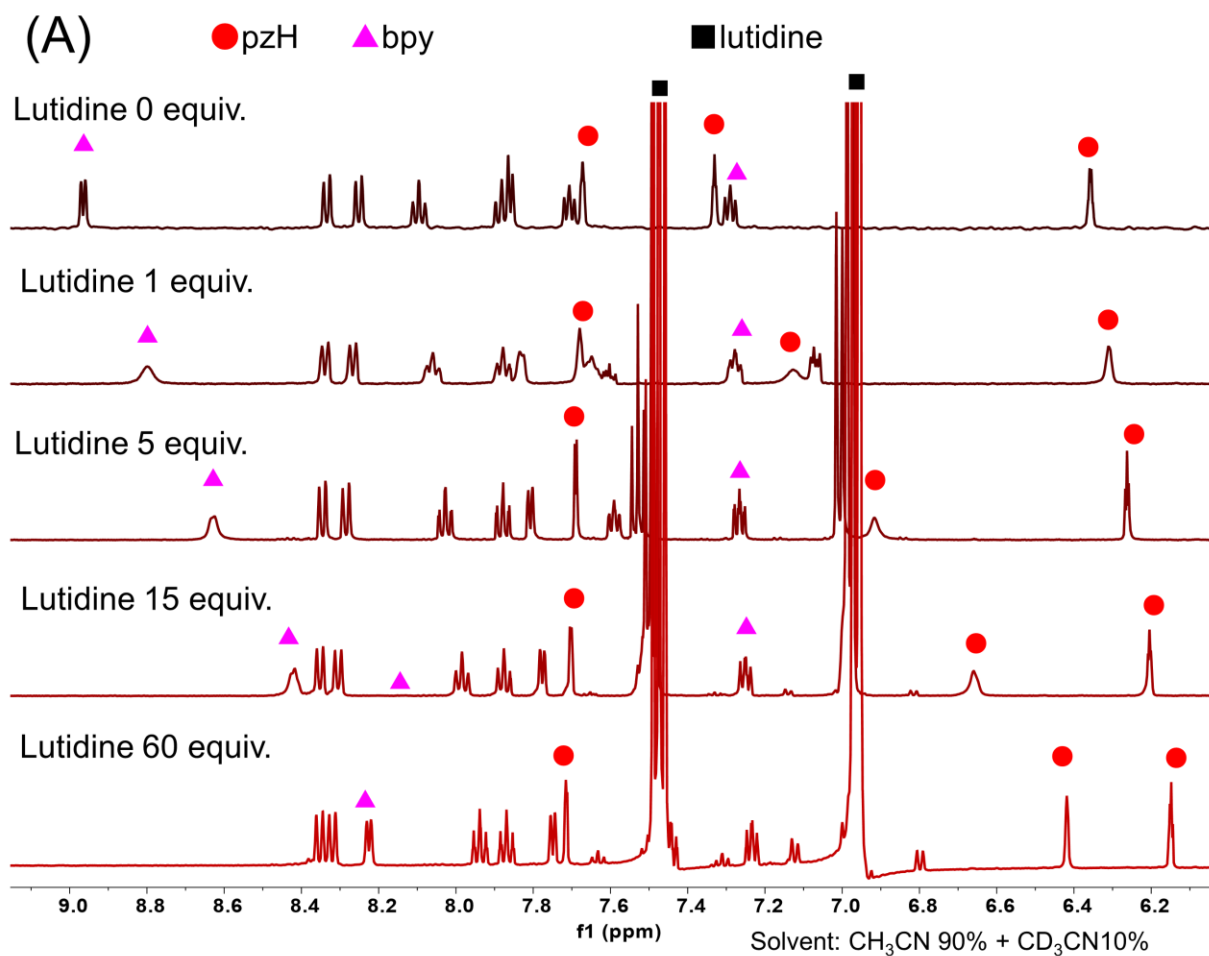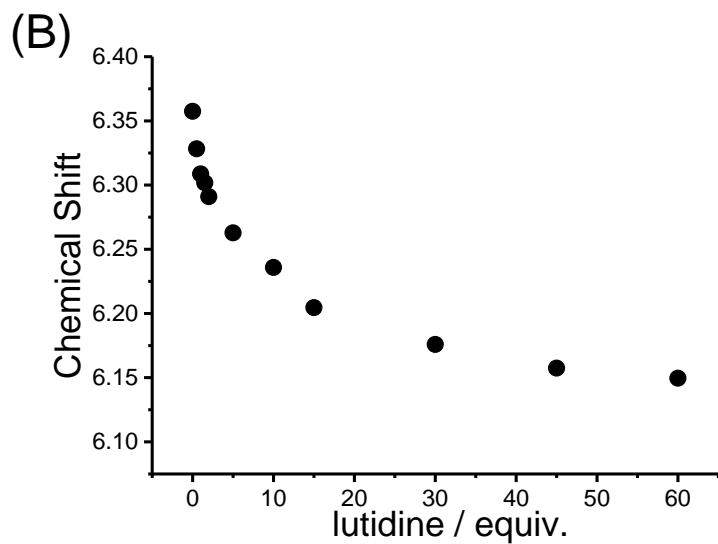

**Figure S3.** (A) <sup>1</sup>H NMR spectra of **1a** (5 mM) during the titration experiment with lutidine ( $pK_a = 14.13$  in acetonitrile<sup>2</sup>) in 90 % CH<sub>3</sub>CN and 10 % CD<sub>3</sub>CN. (B) Plots of chemical shift of a singlet peak at 6.36 ppm upon the addition of lutidine. (C) Titration plot for deprotonation of **1a** to **1b** upon addition with lutidine.

Figure S3. (Continued)

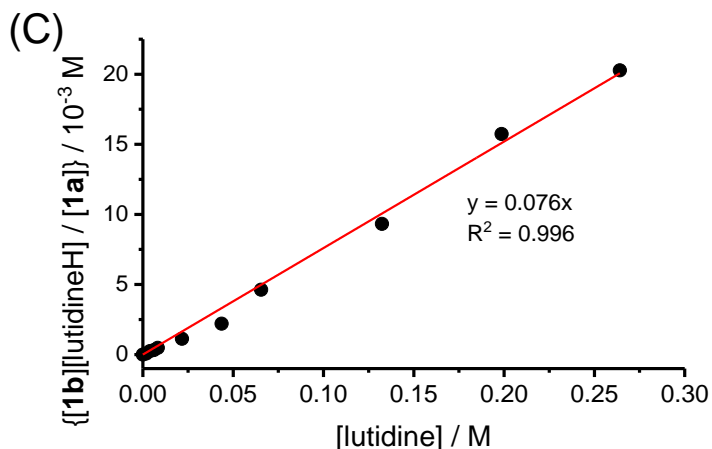

In acetonitrile, **1a** deprotonated quantitatively with DMAP (see Figure 3). The chemical shift of pyrazole proton at 6.36 ppm shifted to 6.11 ppm. The chemical shift of the pyrazole proton for **1a** ( $\delta_{1a}$ ) and **1b** ( $\delta_{1b}$ ) were determined as 6.36 and 6.11 ppm, respectively. The proportion of **1a** to the total concentration of ruthenium complexes was calculated from the equation:

$$\frac{[\mathbf{1a}]}{[\mathbf{1a}] + [\mathbf{1b}]} = \left| \frac{\delta_{\text{obsd}} - \delta_{1b}}{\delta_{1a} - \delta_{1b}} \right|$$

where  $\delta_{\text{obsd}}$  is the observed chemical shift. In the titration experiment with lutidine ( $\text{p}K_a = 14.13^2$ ), the  $\text{p}K_a$  value of **1a** was determined from the linear plot of  $[\mathbf{1b}][\text{lutidineH}] / [\mathbf{1a}]$  versus  $[\text{lutidine}]$ .<sup>3</sup> The concentrations of lutidine and protonated lutidine (lutidineH) were assumed to be equal. The slope of the line represents an equilibrium constant value of  $K = 0.076$

where:

$$K = \frac{[\mathbf{1b}][\text{lutidineH}]}{[\mathbf{1a}][\text{lutidine}]}$$

The  $\text{p}K$  was 1.12, which corresponds to the difference of  $\text{p}K_a$  values of **1a** and lutidine. The  $\text{p}K_a$  of **1a** was determined to be 15.2.

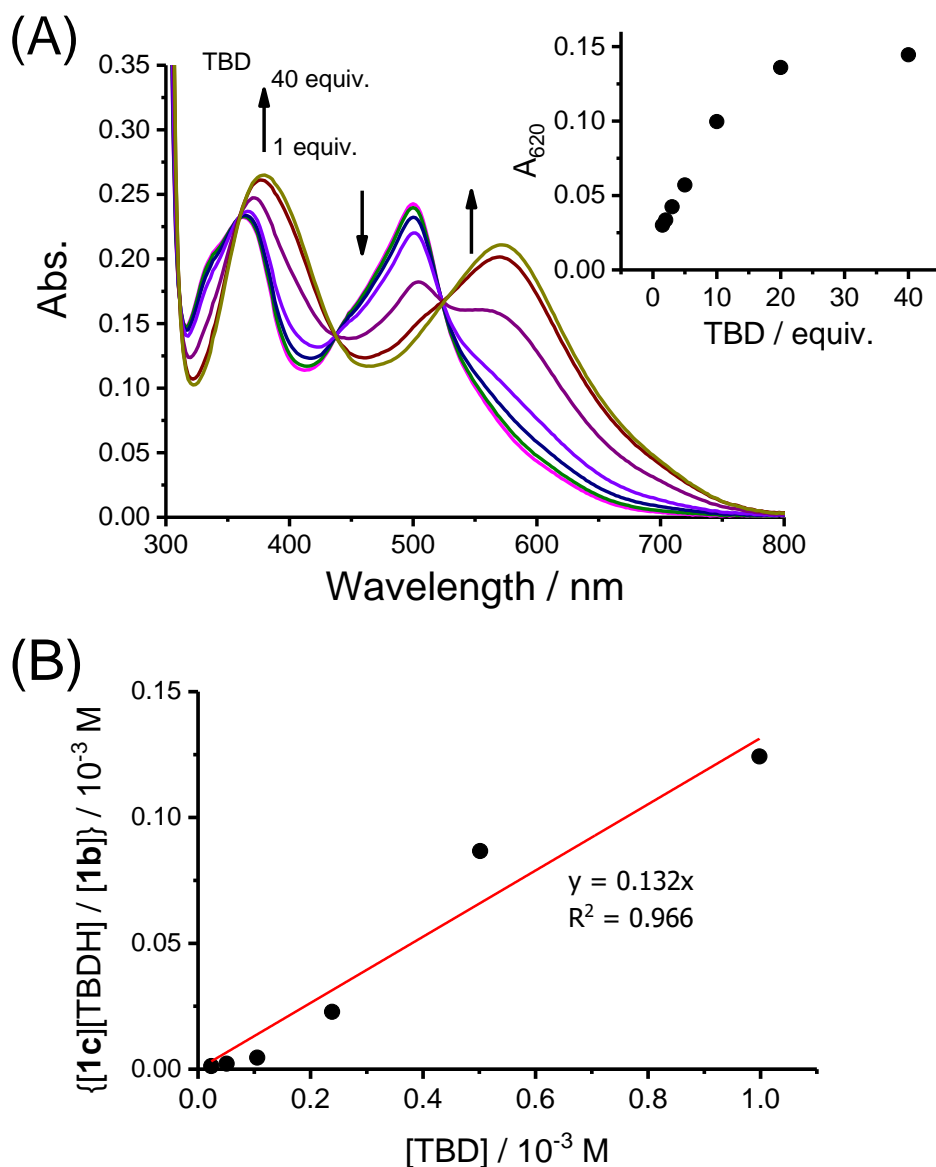

**Figure S4.** (A) Absorption spectral changes of **1b** during the titration experiments with TBD in MeCN. Inset shows the changes of absorption at 620 nm upon addition of TBD ( $pK_a = 26.03$ ). The absorption maxima (572 nm) of neutral complex is close to the reported value of neutral complex **1c** (581 nm) in DMF. (B) Titration plot for deprotonation of **1b** to **1c** upon addition with TBD

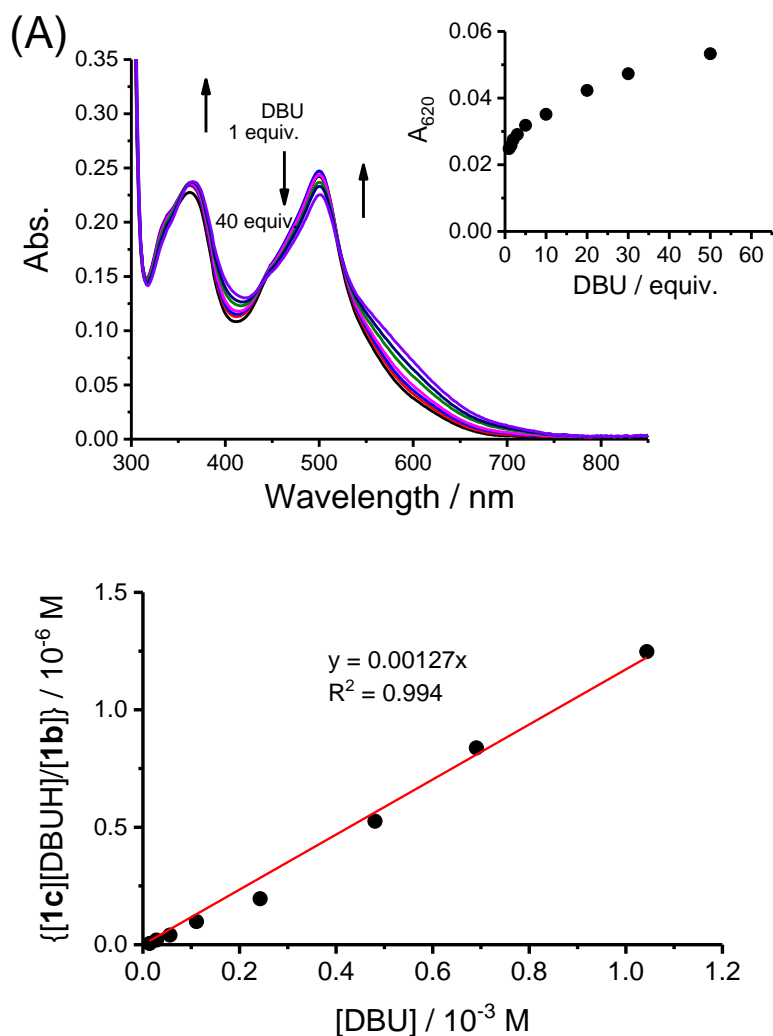

**Figure S5.** (A) Absorption spectral changes of **1b** during the titration experiments with DBU in MeCN. Inset shows the changes of absorption at 620 nm upon addition of DBU ( $pK_a = 24.34$ ). (B) Titration plot for deprotonation of **1b** to **1c** upon addition with DBU.



Determination of  $pK_a$  value by absorption spectroscopy

The  $pK_a$  value of **1b** was determined from absorption spectroscopy instead of  $^1H$  NMR spectroscopy due to the poor solubility of **1c**. The proportion of **1b** was calculated from the following equation:

$$\frac{[\mathbf{1b}]}{[\mathbf{1b}] + [\mathbf{1c}]} = \left| \frac{A_{\text{inf}} - A_{\text{obsd}}}{A_{\text{inf}} - A_0} \right|$$

where  $A_{\text{inf}}$ ,  $A_{\text{obsd}}$ ,  $A_0$  were absorbance of **1c** in the presence of 500 equivalents of TBD ( $pK_a = 26.09^2$ ), observed absorbance during the titration experiment, initial absorbance of **1b** before titration. The  $pK_a$  value of **1b** was determined from the linear plot of  $[\mathbf{1c}][\text{TBDH}] / [\mathbf{1b}]$  versus  $[\text{TBD}]$ .<sup>3</sup> The concentrations of TBD and protonated TBD (TBDH) were assumed to be equal. The slope of the line represents an equilibrium constant value of  $K = 0.132$  as shown in Figure S4B.

where:

$$K = \frac{[\mathbf{1c}][\text{TBDH}]}{[\mathbf{1b}][\text{TBD}]}$$

The  $pK$  was 0.88, which corresponds to the difference of  $pK_a$  values of **1b** and TBD. The  $pK_a$  of **1b** was determined to be 26.9.

The titration experiments were carried out with DBU ( $pK_a = 24.34^2$ ) (Figure S5). In the same manner, The  $pK_a$  value of **1b** was determined from the linear plot of  $[\mathbf{1c}][\text{DBUH}] / [\mathbf{1b}]$  versus  $[\text{DBU}]$ . The slope of the line represents an equilibrium constant value of  $K' = 0.00127$

where:

$$K' = \frac{[\mathbf{1c}][\text{DBUH}]}{[\mathbf{1b}][\text{DBU}]}$$

The  $pK$  was 2.89, which corresponds to the difference of  $pK_a$  values of **1b** and DBU. The  $pK_a$  of **1b** was estimated to be 27.2, which approximately coincides with the  $pK_a$  value of 26.9 estimated from the titration with TBD.

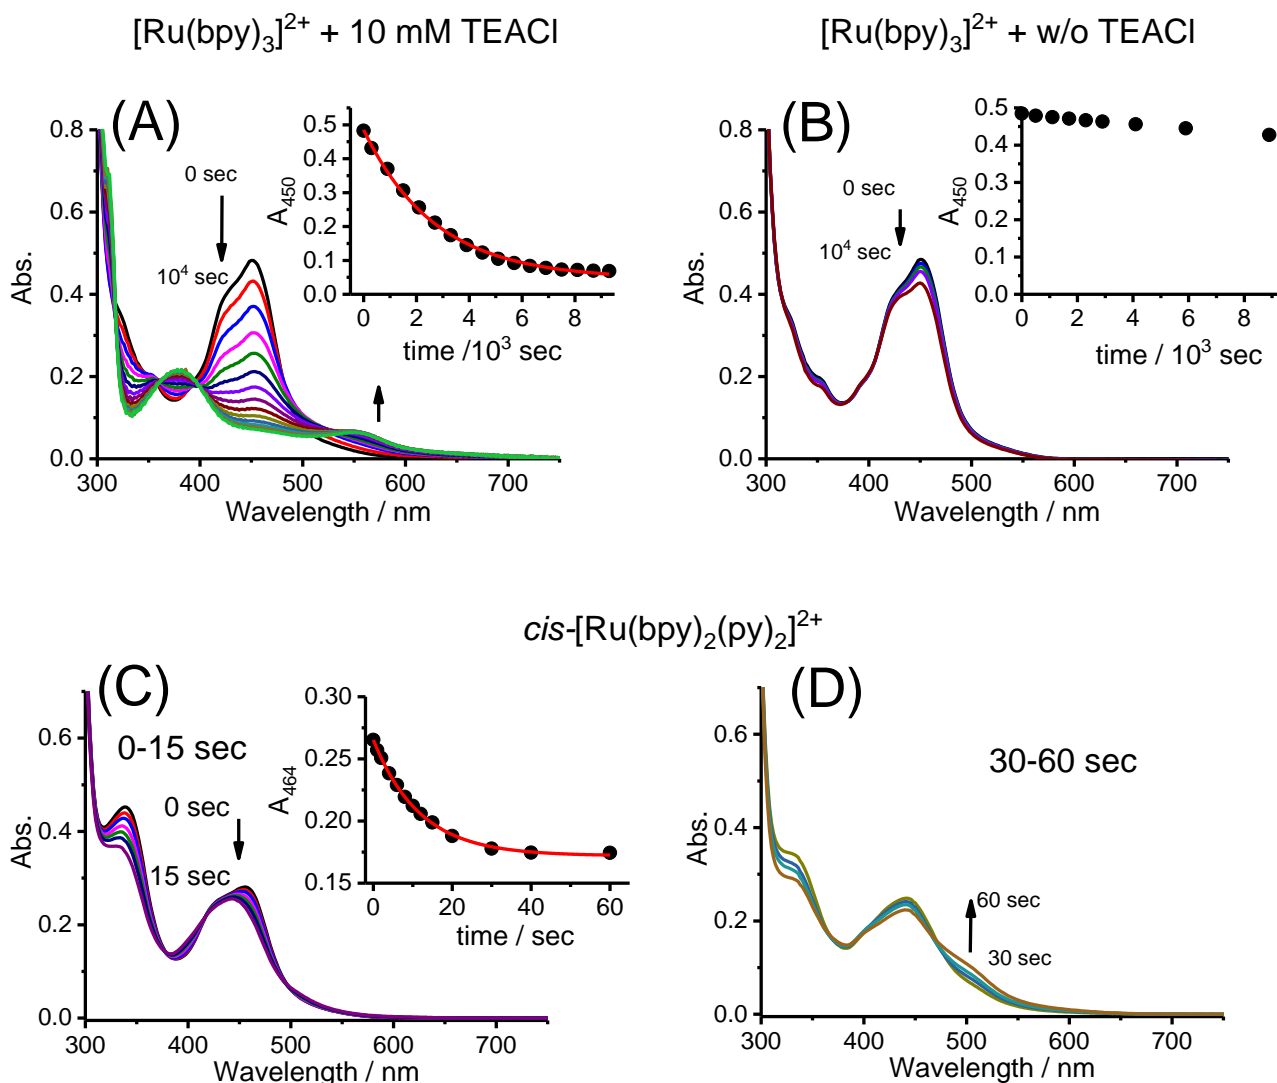

**Figure S6.** Absorption spectra of (A)  $[\text{Ru}(\text{bpy})_3]^{2+}$  (32  $\mu\text{M}$ ) and TEACl (10 mM), (B)  $[\text{Ru}(\text{bpy})_3]^{2+}$  (32  $\mu\text{M}$ ), (C)  $\text{cis-}[\text{Ru}(\text{bpy})_2(\text{py})_2]^{2+}$  (0-15sec), and (D)  $\text{cis-}[\text{Ru}(\text{bpy})_2(\text{py})_2]^{2+}$  (30-60 sec) during photolysis with blue LED ( $\lambda = 470 \text{ nm}$ ,  $14 \text{ mW cm}^{-2}$ ) in acetonitrile containing 10 mM TEACl at 298 K. Insets in Figure S7(C) show kinetic traces based on the absorbance changes (black dots) and fitting curves (red line).

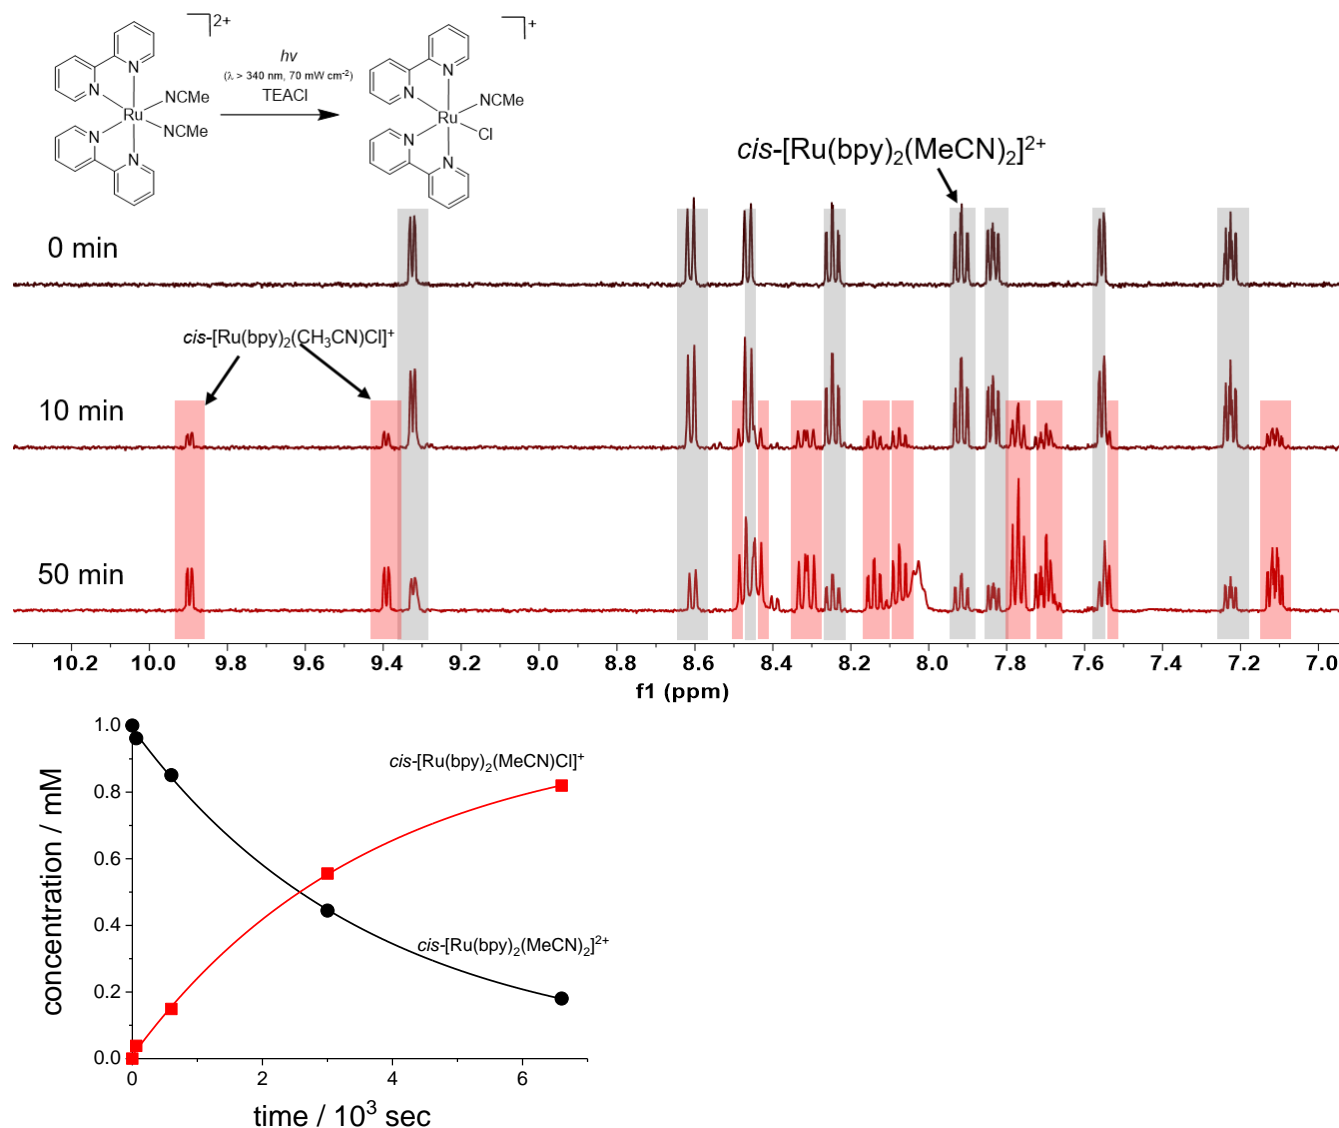

**Figure S7.** (A)  $^1\text{H}$  NMR spectra of  $\text{cis-[Ru(bpy)}_2(\text{MeCN})_2\text{]}^{2+}$  (1.0 mM), during photolysis with polychromatic light ( $\lambda > 340 \text{ nm}$ ,  $70 \text{ mW cm}^{-2}$ ) in  $\text{CH}_3\text{CN}$  and  $\text{CD}_3\text{CN}$  ( $\text{CH}_3\text{CN} : \text{CD}_3\text{CN} = 1:1$ ) containing 10 mM TEACl. Peaks of  $\text{cis-[Ru(bpy)}_2(\text{MeCN})_2\text{]}^{2+}$  and  $\text{cis-[Ru(bpy)}_2(\text{MeCN})\text{Cl}]^+$  are highlighted with gray and red, respectively. (B) Kinetic traces of  $\text{cis-[Ru(bpy)}_2(\text{MeCN})_2\text{]}^{2+}$  (black) and  $\text{cis-[Ru(bpy)}_2(\text{MeCN})\text{Cl}]^+$  (red), where the concentrations of the reactant and product were calculated based on the integrations at 9.33 and 9.38 ppm, respectively.

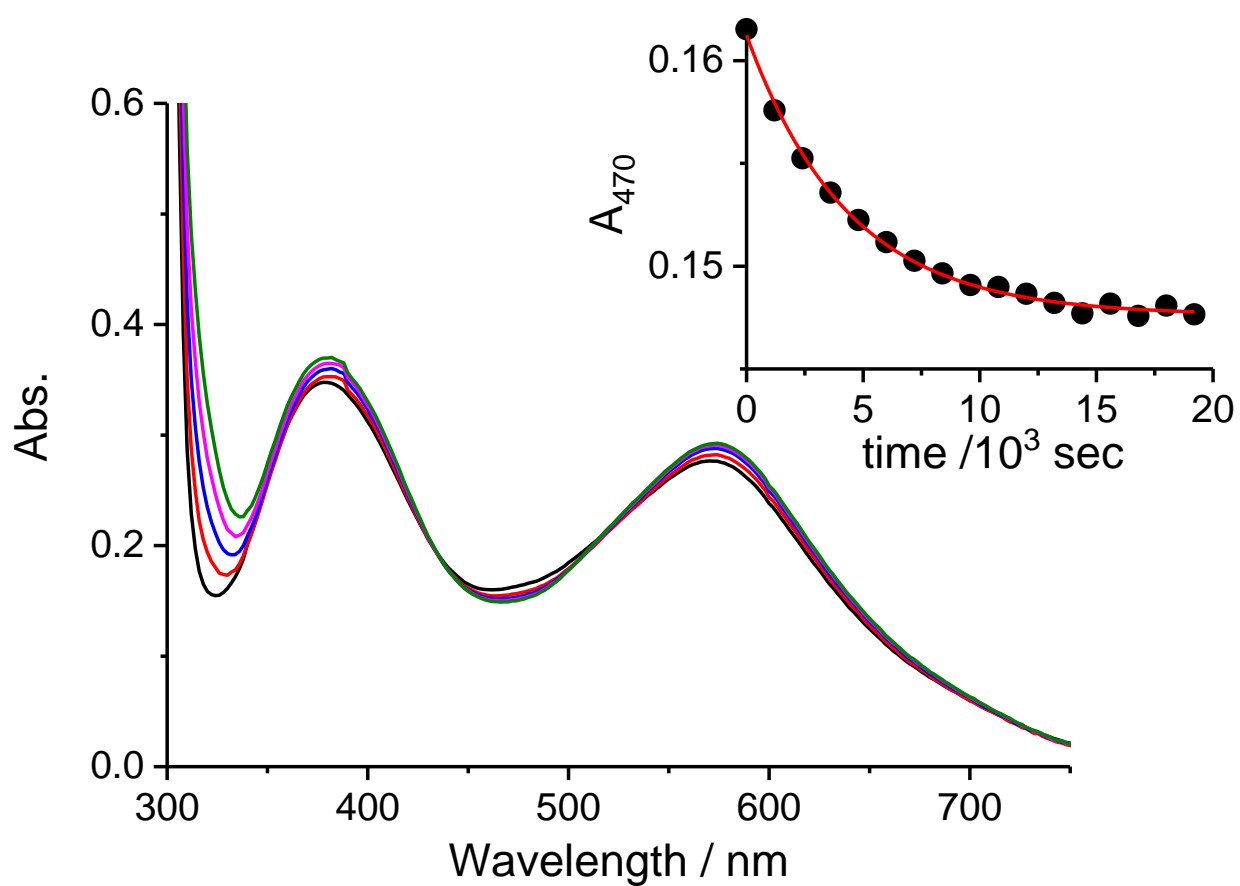

**Figure S8.** Absorption spectra of **1c** (37  $\mu\text{M}$ ) and TBD (16 mM) during photolysis with blue LED ( $\lambda = 470$  nm,  $14 \text{ mW cm}^{-2}$ ) in acetonitrile containing 10 mM TEACl. Insets show kinetic traces based on the absorbance changes (black dots) and fitting curves (red line).

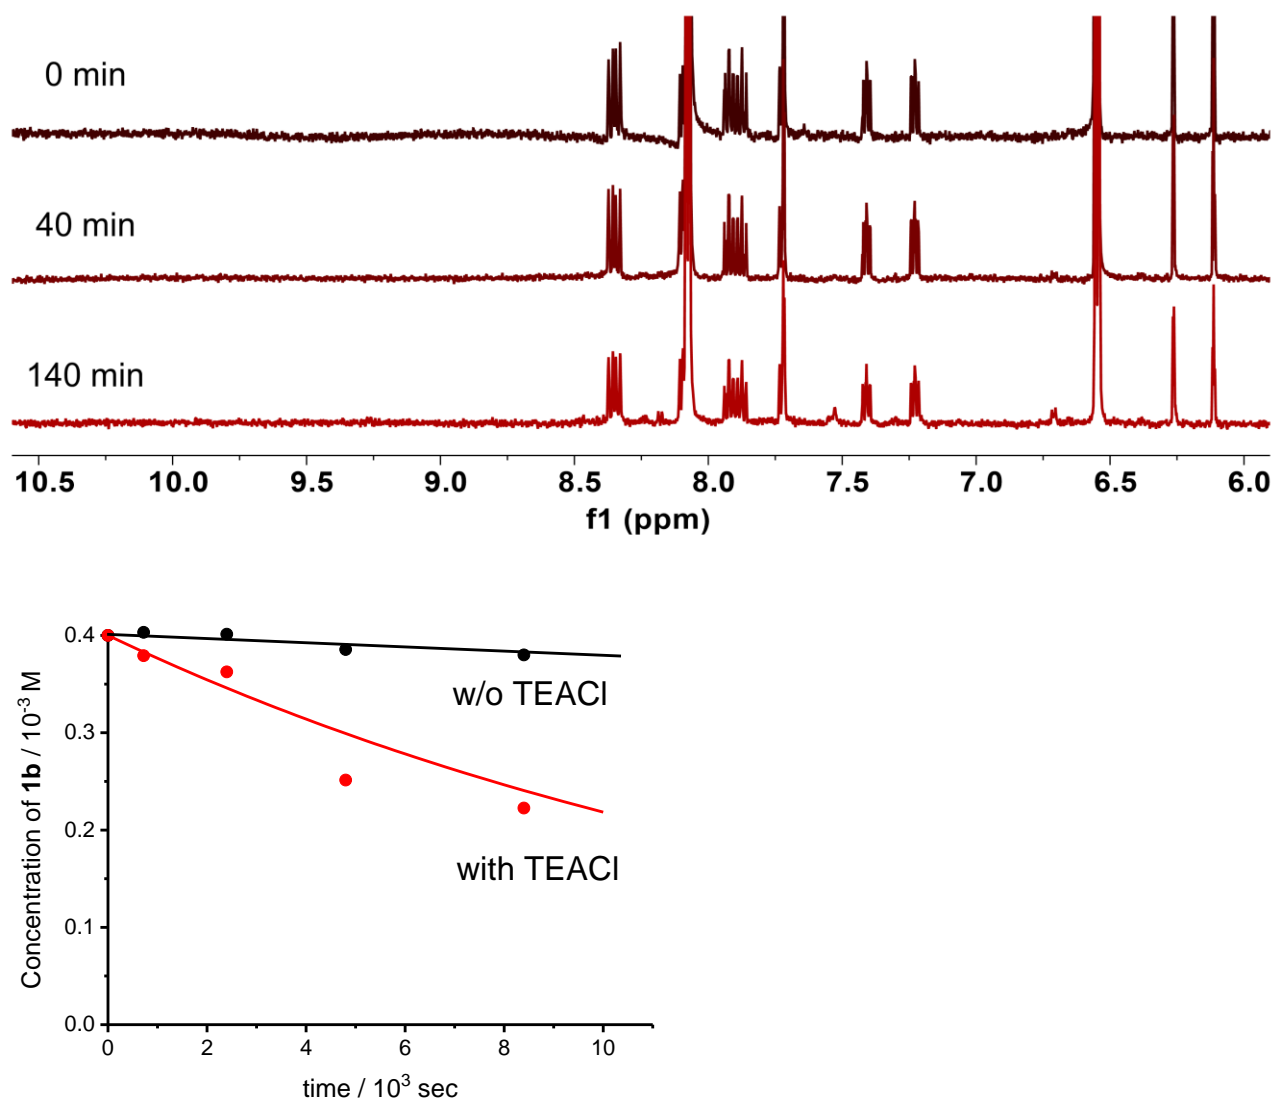

**Figure S9.** (A)  $^1\text{H}$  NMR spectra of **1b** (0.4 mM), during photolysis with polychromatic light ( $\lambda > 340 \text{ nm}$ ,  $70 \text{ mW cm}^{-2}$ ) in acetonitrile/ $\text{CD}_3\text{CN}$  containing 4 mM DMAP. (B) Kinetic traces of **1b** during photolysis in the absence (black) and presence (red) of TEACl. The concentration of **1b** was calculated based on the integrations of the peak at 7.22 ppm.

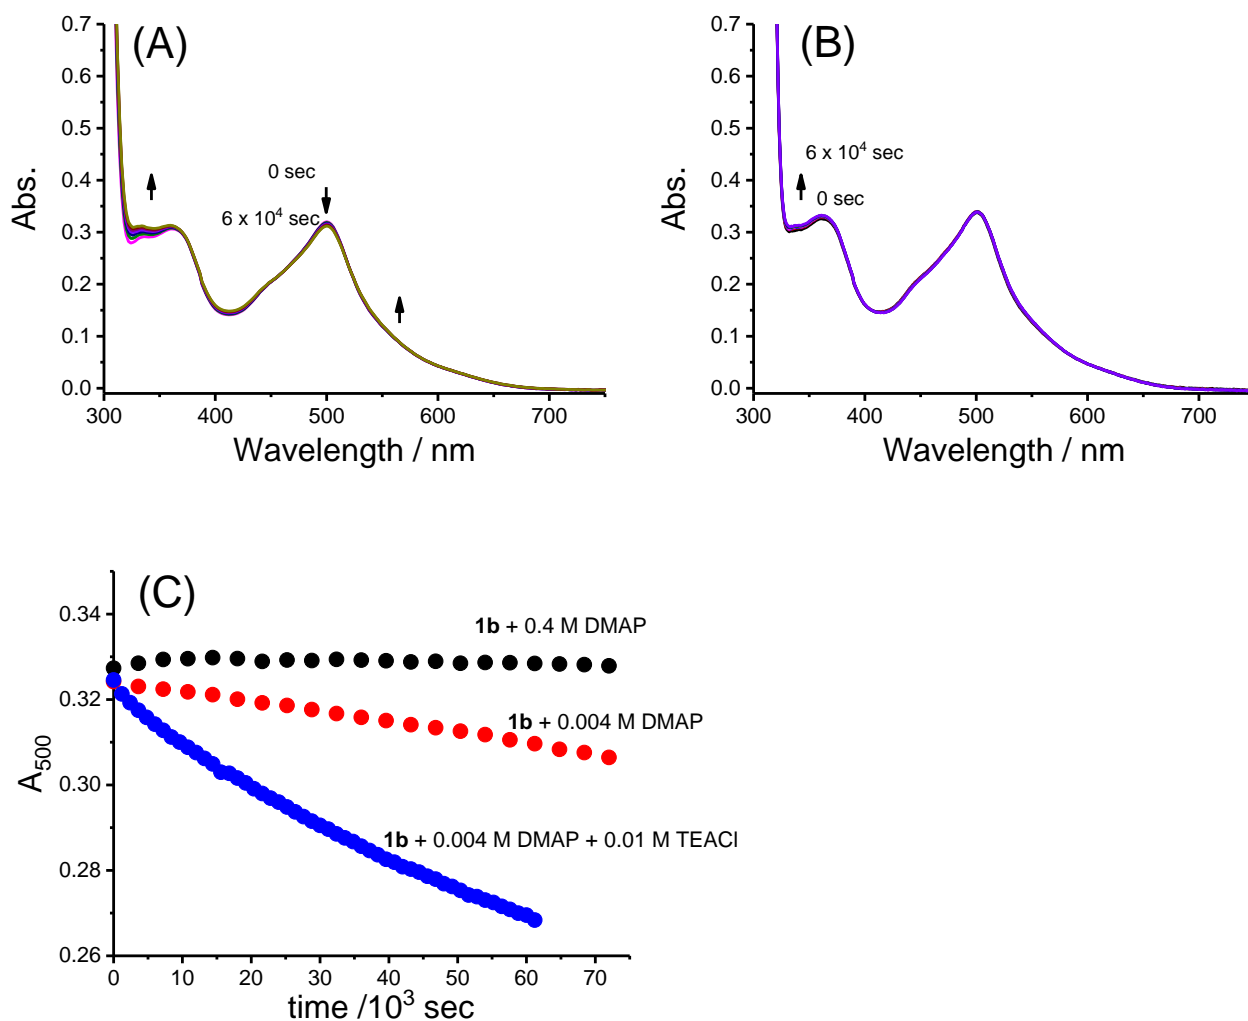

**Figure S10.** Absorption spectra of (A) **1b** (38  $\mu\text{M}$ ) with 4 mM DMAP and (B) **1b** (38  $\mu\text{M}$ ) with 0.4 M DMAP during photolysis with blue LED ( $\lambda = 470$  nm,  $14 \text{ mW cm}^{-2}$ ) in the absence of TEACl in acetonitrile. The increase of absorbance below 340 nm may be an absorption band of protonated DMAP ( $\text{DMAPH}^+$ ),<sup>4</sup> which was formed overtime by the protonation with trace amount of water. (C) Kinetic traces of **1b** based on the absorbance changes at 540 nm in the presence of 0.4 M DMAP (black), 4 mM DMAP (red), and 4 mM DMAP and 0.01 M TEACl (blue).

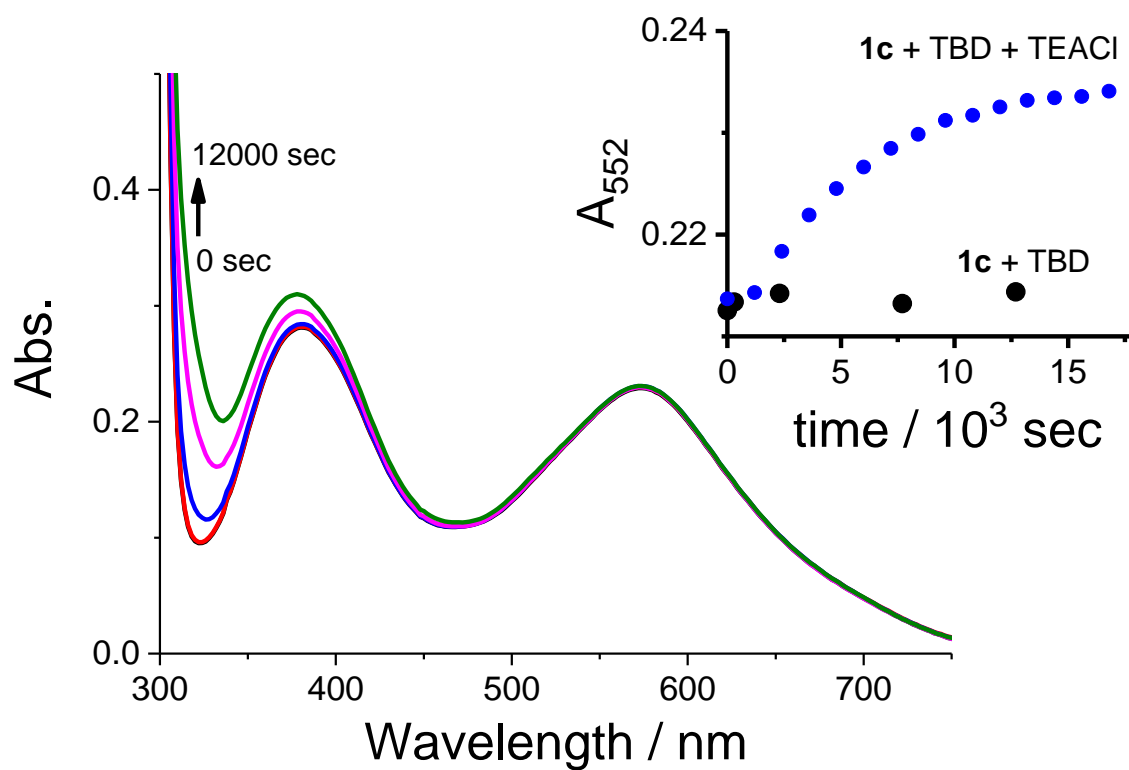

**Figure S11.** Absorption spectra of **1c** (33  $\mu\text{M}$ ) and TBD (10 mM) during photolysis with blue LED ( $\lambda = 470\text{ nm}$ ,  $14\text{ mW cm}^{-2}$ ) in acetonitrile. Inset shows kinetic traces base on the absorbance changes at 552nm of the sample solution containing **1c** and TBD (black) and **1c**, TBD, and TEACl (blue)

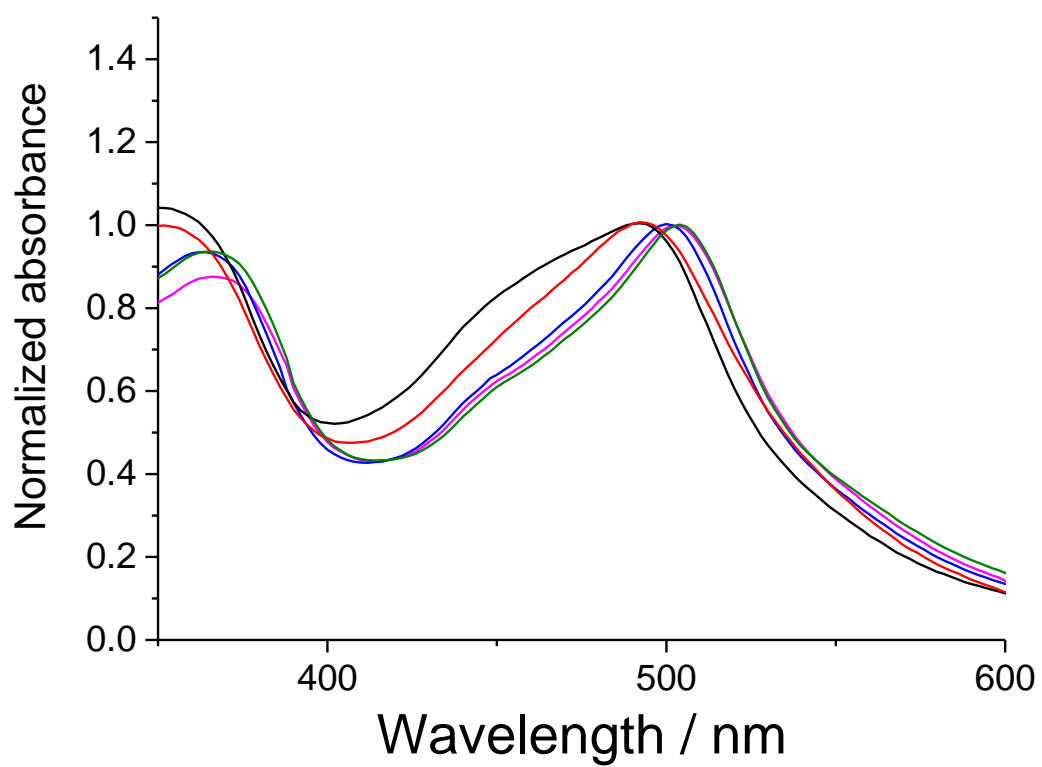

**Figure S12.** Normalized absorption spectra of **1b** in TFE (black), water (red, pH = 12), MeCN (blue), DMSO (cyan) , and MeOH (green).



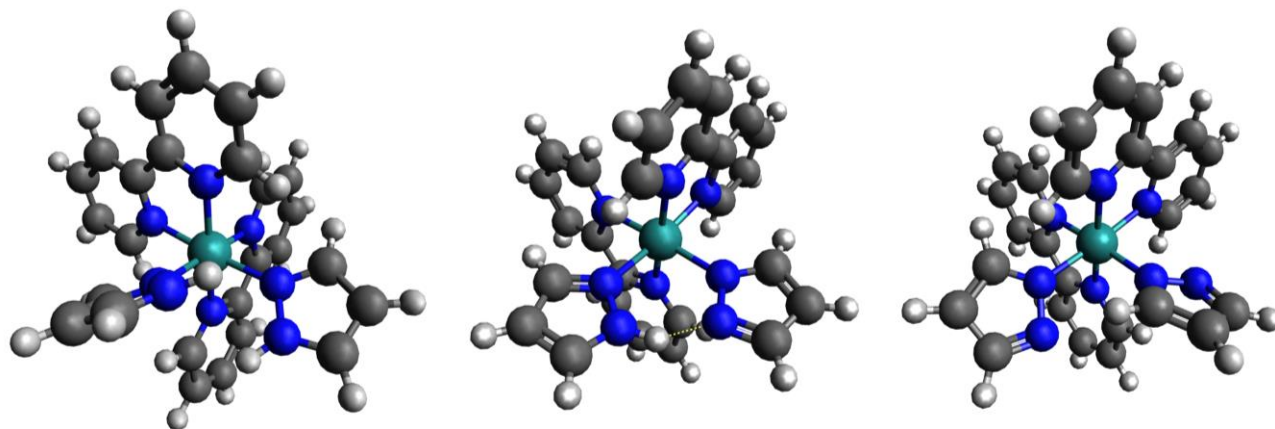

**Figure S13.** Optimized structures of **1a** (left), **1b** (center), and **1c** (right), which were optimized at the B3LYP level of DFT using LanL2DZ basis set in Gaussian 09.

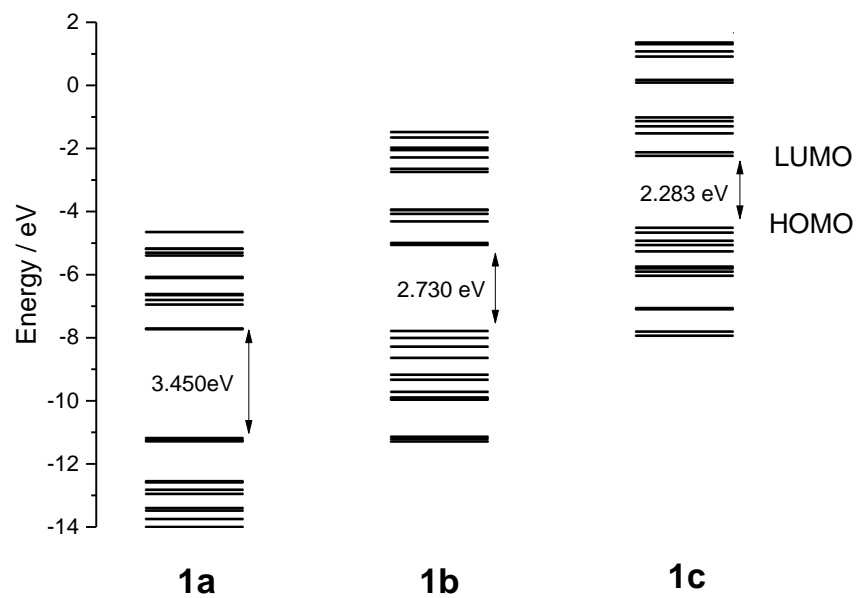

**Figure S14.** Energy level diagram of molecular orbitals (HOMO–12 to LUMO+12) of **1a**, **1b**, and **1c**.

Complex geometries were fully optimized under gaseous conditions using the B3LYP method.

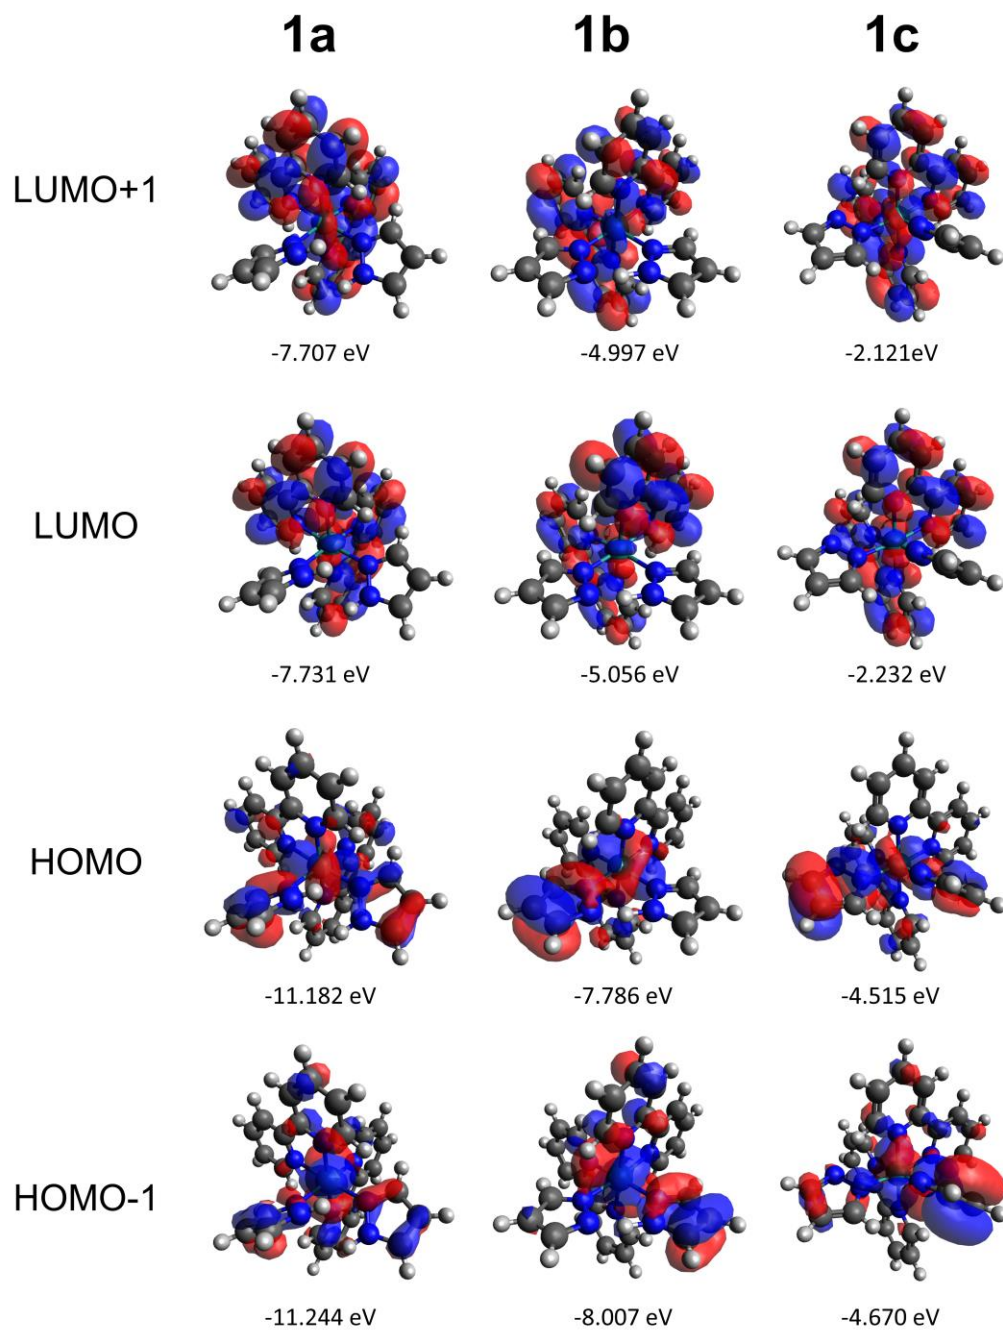

**Figure S15.** Frontier molecular orbitals of **1a**, **1b**, and **1c**.

**Table S1.** Selected crystallographic parameters

| compounds                                                                 | [ <b>1a</b> ](CF <sub>3</sub> SO <sub>3</sub> ) <sub>2</sub>                                  | [ <b>1b</b> ](PF <sub>6</sub> )                                  |
|---------------------------------------------------------------------------|-----------------------------------------------------------------------------------------------|------------------------------------------------------------------|
| empirical formula                                                         | RuS <sub>2</sub> F <sub>6</sub> O <sub>6</sub> N <sub>8</sub> C <sub>28</sub> H <sub>24</sub> | RuPF <sub>6</sub> N <sub>8</sub> C <sub>26</sub> H <sub>23</sub> |
| fw                                                                        | 847.74                                                                                        | 693.56                                                           |
| radiation                                                                 | Mo K $\alpha$                                                                                 | Mo K $\alpha$                                                    |
| crystal system                                                            | monoclinic                                                                                    | orthorhombic                                                     |
| space group                                                               | <i>C2/c</i>                                                                                   | <i>P2<sub>1</sub>2<sub>1</sub>2<sub>1</sub></i>                  |
| <i>a</i> , Å                                                              | 22.637(10)                                                                                    | 11.9435(2)                                                       |
| <i>b</i> , Å                                                              | 11.256(5)                                                                                     | 12.3203(2)                                                       |
| <i>c</i> , Å                                                              | 16.144(13)                                                                                    | 18.0256(3)                                                       |
| $\alpha$ , deg                                                            | 90                                                                                            | 90                                                               |
| $\beta$ , deg                                                             | 128.144(4)                                                                                    | 90                                                               |
| $\gamma$ , deg                                                            | 90                                                                                            | 90                                                               |
| <i>V</i> , Å <sup>3</sup>                                                 | 3235(3)                                                                                       | 2652.42(8)                                                       |
| <i>Z</i>                                                                  | 4                                                                                             | 4                                                                |
| $\mu$ , mm <sup>-1</sup>                                                  | 0.705                                                                                         | 0.728                                                            |
| <i>T</i> , K                                                              | 100                                                                                           | 100                                                              |
| <i>d</i> <sub>cal</sub> , g/cm <sup>3</sup>                               | 1.741                                                                                         | 1.737                                                            |
| <i>T</i> <sub>min</sub> , <i>T</i> <sub>max</sub>                         | 0.5844, 0.7456                                                                                | 0.711, 0.745                                                     |
| <i>N</i> <sub>ref</sub>                                                   | 3712                                                                                          | 5236                                                             |
| <i>R</i> [ <i>F</i> <sup>2</sup> > 2 $\sigma$ ( <i>F</i> <sup>2</sup> )]  | 0.0632                                                                                        | 0.0173                                                           |
| <i>wR</i> [ <i>F</i> <sup>2</sup> > 2 $\sigma$ ( <i>F</i> <sup>2</sup> )] | 0.1076                                                                                        | 0.0429                                                           |
| GOF                                                                       | 1.0195                                                                                        | 1.054                                                            |

**Table S2 Selected bond distances (Å) and angles (°)**

|                                          | [1a](CF <sub>3</sub> SO <sub>3</sub> ) <sub>2</sub> | [1b](PF <sub>6</sub> ) |
|------------------------------------------|-----------------------------------------------------|------------------------|
| Ru1-N1 <sub>bpy</sub>                    | 2.057(5)                                            | 2.0696(16)             |
| Ru1-N1 <sub>bpy</sub>                    | 2.065(4)                                            | 2.0552(16)             |
| Ru1-N3 <sub>pzH</sub>                    | 2.087(5)                                            |                        |
| Ru1-N3 <sub>bpy</sub>                    |                                                     | 2.0482(15)             |
| Ru1-N4 <sub>bpy</sub>                    |                                                     | 2.0510(16)             |
| Ru1-N5 <sub>pzH</sub>                    |                                                     | 2.0917(17)             |
| Ru1-N7 <sub>pz</sub>                     |                                                     | 2.0960(15)             |
| N1 <sub>bpy</sub> -Ru1-N1 <sub>bpy</sub> | 89.9(3)                                             |                        |
| N1 <sub>bpy</sub> -Ru1-N2 <sub>bpy</sub> | 79.12(18), 95.02(18)                                | 97.13(17)              |
| N1 <sub>bpy</sub> -Ru1-N3 <sub>pzH</sub> | 176.27(18), 90.26(16)                               |                        |
| N2 <sub>bpy</sub> -Ru1-N2 <sub>bpy</sub> | 171.8(3)                                            |                        |
| N2 <sub>bpy</sub> -Ru1-N3 <sub>pzH</sub> | 88.68(17), 97.15(18)                                |                        |
| N3 <sub>pzH</sub> -Ru1-N3 <sub>pzH</sub> | 89.8(3)                                             |                        |
| N1 <sub>bpy</sub> -Ru1-N3 <sub>bpy</sub> |                                                     | 174.66(6)              |
| N1 <sub>bpy</sub> -Ru1-N4 <sub>bpy</sub> |                                                     | 98.84(6)               |
| N1 <sub>bpy</sub> -Ru1-N5 <sub>pzH</sub> |                                                     | 85.30(6)               |
| N1 <sub>bpy</sub> -Ru1-N7 <sub>pz</sub>  |                                                     | 97.28(6)               |
| N2 <sub>bpy</sub> -Ru1-N3 <sub>bpy</sub> |                                                     | 96.08(6)               |
| N2 <sub>bpy</sub> -Ru1-N4 <sub>bpy</sub> |                                                     | 87.62(6)               |
| N2 <sub>bpy</sub> -Ru1-N5 <sub>pzH</sub> |                                                     | 91.94(6)               |
| N2 <sub>bpy</sub> -Ru1-N7 <sub>pz</sub>  |                                                     | 174.70(6)              |
| N3 <sub>bpy</sub> -Ru1-N4 <sub>bpy</sub> |                                                     | 174.70(6)              |
| N3 <sub>bpy</sub> -Ru1-N5 <sub>pzH</sub> |                                                     | 96.72(6)               |
| N3 <sub>bpy</sub> -Ru1-N7 <sub>pz</sub>  |                                                     | 87.63(6)               |
| N4 <sub>bpy</sub> -Ru1-N5 <sub>pzH</sub> |                                                     | 175.66(6)              |
| N4 <sub>bpy</sub> -Ru1-N7 <sub>pz</sub>  |                                                     | 89.38(6)               |
| N5 <sub>pzH</sub> -Ru1-N7 <sub>pz</sub>  |                                                     | 91.37(6)               |
| N4 <sub>pzH</sub> •••N4 <sub>pzH</sub>   | 3.180(9)                                            |                        |
| N6 <sub>pzH</sub> •••N8 <sub>pz</sub>    |                                                     | 2.623(2)               |

## References

- (1) Sullivan, B. P.; Salmon, D. J.; Meyer, T. J.; Peedin, J. Monomeric and dimeric pyrazole and pyrazolyl complexes of ruthenium. *Inorg. Chem.* **1979**, *18*, 3369-3374.
- (2) Kaljurand, I.; Kütt, A.; Sooväli, L.; Rodima, T.; Mäemets, V.; Leito, I.; Koppel, I. A. Extension of the Self-Consistent Spectrophotometric Basicity Scale in Acetonitrile to a Full Span of 28 pKa Units: Unification of Different Basicity Scales. *The Journal of Organic Chemistry* **2005**, *70*, 1019-1028.
- (3) Reed, C. J.; Agapie, T. Thermodynamics of Proton and Electron Transfer in Tetranuclear Clusters with Mn–OH<sub>2</sub>/OH Motifs Relevant to H<sub>2</sub>O Activation by the Oxygen Evolving Complex in Photosystem II. *J. Am. Chem. Soc.* **2018**, *140*, 10900-10908.
- (4) Mishina, S.; Takayanagi, M.; Nakata, M.; Otsuki, J.; Araki, K. Dual fluorescence of 4-dimethylaminopyridine and its derivatives: Effects of methyl substitution at the pyridine ring. *J. Photochem. Photobiol. A-Chem.* **2001**, *141*, 153-158.
